# Supplementary material for: Metabolic gene alterations impact the clinical aggressiveness and drug responses of 32 human cancers
Source: PubMed Central journal article supplement (PMC6856368; doi:10.1038/s42003-019-0666-1), 2019-11-14
Supplement: 42003_2019_666_MOESM1_ESM.pdf [file 42003_2019_666_MOESM1_ESM.pdf]

# 1 Supplementary Information

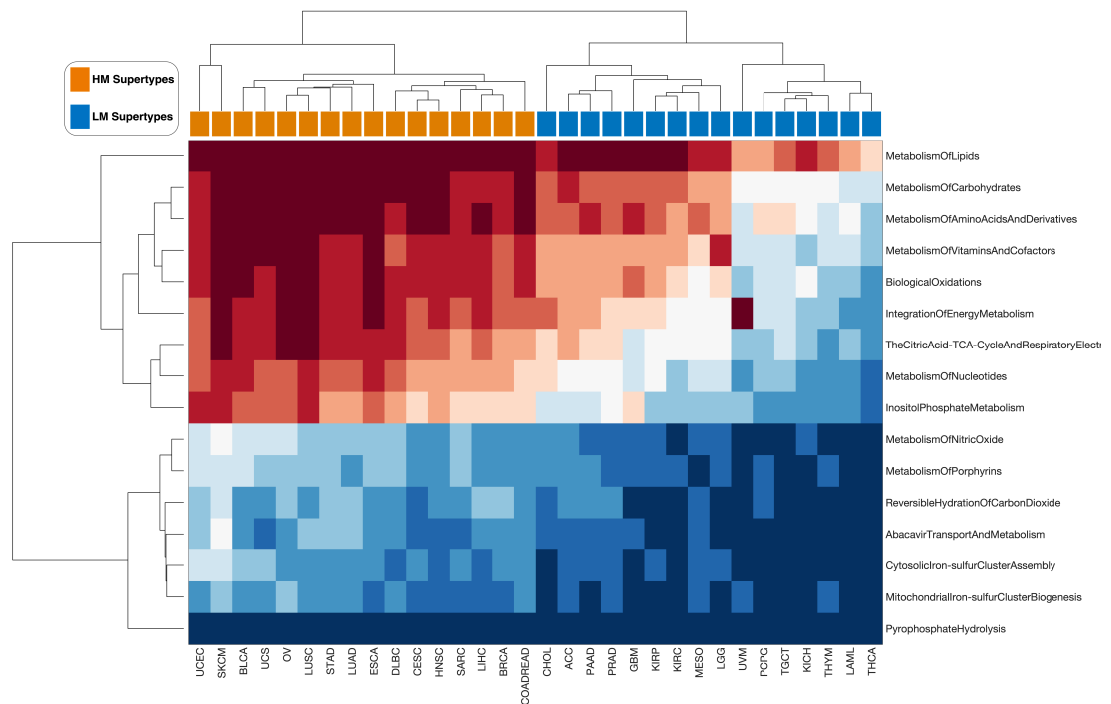

2  
3 **Supplementary Figure 1: Unsupervised hierarchical clustergram of tumours**  
4 assigned to the two metabolic superotypes of human cancers. The fractions of  
5 tumours with altered genes that are involved in each of the 16 first-tier metabolic  
6 pathways were used for clustering. The clustergram was produced using the  
7 Spearman correlation distance metric with complete linkage.

8

| Gene     | UCEC | SKCM | BLCA | LIHC | OV  | LUSC | STAD | LUAD | ESCA | DLBC | CESC | HNSC | SARC | LIHC | BRCA | COADREAD | CHOL | ACC | PAAD | PRAD | GBM | KIPAN | KIRC | MESO | LGGL | UVM | PCPG | TGCT | KICH | THYM | LAML | THCA |
|----------|------|------|------|------|-----|------|------|------|------|------|------|------|------|------|------|----------|------|-----|------|------|-----|-------|------|------|------|-----|------|------|------|------|------|------|
| ADPKC    | 5.7  | 1.9  | 1    | 1.8  | 0.5 | 1.1  | 0.9  | 0.4  | 0.6  | 1.4  | 0.8  | 1.8  | 0.6  | 0.6  | 1    | 1.2      | 1.2  | 0.2 | 0.8  | 1.2  | 0.6 | 0.2   | 0.5  | 0.4  | 0.3  | 1.3 | 0.2  | 0.8  | 0.7  | 0.3  |      |      |
| ENO2     | 3.5  | 3    | 1.5  | 1.8  | 0.3 | 1.1  | 1.1  | 1.2  | 0.6  | 1.4  | 1    | 1.6  | 0.6  | 0.6  | 0.3  | 2.5      | 1.2  | 0.6 | 0.2  | 0.5  | 0.4 | 0.3   | 0.2  | 0.2  | 0.2  | 0.2 | 0.2  | 0.2  | 0.2  | 0.2  | 0.2  |      |
| ENO3     | 6.1  | 2.2  | 1.5  | 1.8  | 0.3 | 0.4  | 1.4  | 1.2  | 0.6  | 1.4  | 1    | 1.6  | 0.6  | 0.6  | 0.3  | 2.5      | 1.2  | 0.6 | 0.2  | 0.5  | 0.4 | 0.3   | 0.2  | 0.2  | 0.2  | 0.2 | 0.2  | 0.2  | 0.2  | 0.2  | 0.2  |      |
| GAPDH5   | 8.4  | 3.3  | 1.7  | 0.3  | 2.8 | 3.1  | 2.2  | 2.2  | 2.5  | 0.8  | 0.4  | 0.3  | 0.3  | 2.1  | 1.2  | 1.2      | 0.6  | 0.2 | 0.4  | 0.7  | 0.9 | 1.6   | 0.2  | 0.2  | 0.2  | 0.2 | 0.2  | 0.2  | 0.2  | 0.2  | 0.2  |      |
| GPI      | 4.9  | 5.6  | 1.7  | 0.3  | 2.6 | 1.9  | 2.6  | 1.1  | 1.8  | 1.4  | 0.4  | 0.9  | 0.6  | 2.7  | 2.8  | 1.8      | 1.8  | 0.4 | 0.5  | 0.7  | 0.9 | 1.3   | 0.2  | 0.2  | 0.2  | 0.2 | 0.2  | 0.2  | 0.2  | 0.2  | 0.2  |      |
| GSK3B    | 2.9  | 0.8  | 1.7  | 1.8  | 0.5 | 0.4  | 2.2  | 0.2  | 0.6  | 2.2  | 0.8  | 0.9  | 0.3  | 1.1  | 1.2  | 0.6      | 0.2  | 0.5 | 0.7  | 0.9  | 0.9 | 0.9   | 0.2  | 0.2  | 0.2  | 0.2 | 0.2  | 0.2  | 0.2  | 0.2  | 0.2  |      |
| GAPDH5   | 8.4  | 3.3  | 1.7  | 0.3  | 2.8 | 3.1  | 2.2  | 2.2  | 2.5  | 0.8  | 0.4  | 0.3  | 0.3  | 2.1  | 1.2  | 1.2      | 0.6  | 0.2 | 0.4  | 0.7  | 0.9 | 1.6   | 0.2  | 0.2  | 0.2  | 0.2 | 0.2  | 0.2  | 0.2  | 0.2  | 0.2  |      |
| GOT1     | 5.7  | 4.4  | 1.5  | 3.6  | 0.3 | 0.4  | 1.9  | 1    | 1.8  | 1    | 0.3  | 0.3  | 3.1  | 1.2  | 1.2  | 0.2      | 0.3  | 0.4 | 1.1  | 0.2  | 0.9 | 1.6   | 0.2  | 0.2  | 0.2  | 0.2 | 0.2  | 0.2  | 0.2  | 0.2  | 0.2  |      |
| GOT2     | 3.9  | 3    | 0.5  | 1.3  | 0.9 | 1.4  | 1.1  | 0.8  | 0.7  | 1.1  | 0.8  | 0.2  | 1.3  | 2.3  | 2.3  | 0.2      | 0.8  | 0.9 | 0.9  | 0.9  | 0.9 | 0.9   | 0.2  | 0.2  | 0.2  | 0.2 | 0.2  | 0.2  | 0.2  | 0.2  | 0.2  |      |
| GPI      | 4.9  | 5.6  | 1.7  | 0.3  | 2.6 | 1.9  | 2.6  | 1.1  | 1.8  | 1.4  | 0.4  | 0.9  | 0.6  | 2.7  | 2.8  | 1.8      | 1.8  | 0.4 | 0.5  | 0.7  | 0.9 | 1.3   | 0.2  | 0.2  | 0.2  | 0.2 | 0.2  | 0.2  | 0.2  | 0.2  | 0.2  |      |
| PC       | 3.6  | 3.9  | 3.7  | 1.8  | 3.6 | 5.6  | 2.6  | 1.7  | 1.4  | 3.4  | 0.4  | 1.4  | 1.4  | 2.7  | 2.8  | 1.2      | 1.8  | 0.4 | 1.1  | 1.8  | 0.6 | 0.2   | 0.2  | 0.2  | 0.2  | 0.2 | 0.2  | 0.2  | 0.2  | 0.2  | 0.2  |      |
| PKC2     | 5.7  | 5.2  | 0.7  | 1.1  | 1.1 | 3.8  | 1    | 0.6  | 1.1  | 1    | 1.7  | 0.9  | 2.1  | 1.2  | 1.2  | 0.4      | 0.8  | 1.1 | 0.3  | 0.2  | 1.3 | 0.2   | 0.2  | 0.2  | 0.2  | 0.2 | 0.2  | 0.2  | 0.2  | 0.2  | 0.2  |      |
| PGAM1    | 3.9  | 0.3  | 0.7  | 1.8  | 0.4 | 0.2  | 0.2  | 0.2  | 0.7  | 0.2  | 0.2  | 0.2  | 1.3  | 0.6  | 0.2  | 0.2      | 0.2  | 0.2 | 0.2  | 0.2  | 0.2 | 0.2   | 0.2  | 0.2  | 0.2  | 0.2 | 0.2  | 0.2  | 0.2  | 0.2  | 0.2  |      |
| PGAM2    | 2.4  | 3    | 1.2  | 1.9  | 1.6 | 1.2  | 0.6  | 1.8  | 0.6  | 0.4  | 0.8  | 0.3  | 0.2  | 1.5  | 0.6  | 0.2      | 0.2  | 0.2 | 0.2  | 0.2  | 0.2 | 0.2   | 0.2  | 0.2  | 0.2  | 0.2 | 0.2  | 0.2  | 0.2  | 0.2  | 0.2  |      |
| SLC25A10 | 4.3  | 3.3  | 1.7  | 0.8  | 0.9 | 0.9  | 0.8  | 1    | 0.4  | 0.8  | 0.9  | 0.6  | 0.6  | 0.6  | 0.6  | 0.2      | 1.3  | 0.6 | 0.2  | 0.2  | 0.2 | 0.2   | 0.2  | 0.2  | 0.2  | 0.2 | 0.2  | 0.2  | 0.2  | 0.2  | 0.2  |      |
| SLC25A11 | 3.9  | 4.1  | 1    | 0.9  | 0.9 | 0.9  | 1    | 0.6  | 0.4  | 0.4  | 0.3  | 0.2  | 0.6  | 0.6  | 0.2  | 0.8      | 1.1  | 1.3 | 0.4  | 0.2  | 0.2 | 0.2   | 0.2  | 0.2  | 0.2  | 0.2 | 0.2  | 0.2  | 0.2  | 0.2  | 0.2  |      |
| SLC37A1  | 6.3  | 6.9  | 1.7  | 1.8  | 1   | 2.6  | 1.6  | 1.2  | 1.1  | 2.2  | 0.4  | 0.9  | 0.7  | 1.7  | 2.8  | 1.2      | 0.6  | 0.4 | 0.5  | 1.1  | 0.3 | 0.2   | 0.2  | 0.2  | 0.2  | 0.2 | 0.2  | 0.2  | 0.2  | 0.2  | 0.2  |      |
| SLC37A2  | 6.7  | 4.4  | 1.5  | 1    | 1.3 | 1.6  | 1.4  | 2.8  | 1.1  | 0.6  | 0.4  | 0.3  | 0.9  | 3.1  | 1.2  | 0.6      | 0.4  | 0.5 | 1.1  | 0.3  | 0.2 | 0.2   | 0.2  | 0.2  | 0.2  | 0.2 | 0.2  | 0.2  | 0.2  | 0.2  | 0.2  |      |
| TPH1     | 3.3  | 3.6  | 1    | 1.5  | 1.2 | 1.6  | 0.6  | 0.7  | 1.2  | 0.4  | 0.3  | 0.5  | 0.8  | 1.3  | 0.6  | 0.2      | 0.5  | 1.1 | 0.6  | 0.2  | 0.2 | 0.2   | 0.2  | 0.2  | 0.2  | 0.2 | 0.2  | 0.2  | 0.2  | 0.2  | 0.2  |      |
| ALDOA    | 6.5  | 2.5  | 2.2  | 0.8  | 1.7 | 0.7  | 1.6  | 0.6  | 2.9  | 1    | 0.9  | 0.3  | 1.2  | 1.1  | 1.2  | 0.6      | 0.2  | 0.5 | 1.1  | 0.6  | 0.2 | 0.2   | 0.2  | 0.2  | 0.2  | 0.2 | 0.2  | 0.2  | 0.2  | 0.2  | 0.2  |      |
| ALDOB    | 5.7  | 6.9  | 1.5  | 1    | 1.1 | 1.9  | 1.6  | 2.2  | 2.7  | 2.2  | 1.2  | 1.3  | 1.4  | 0.5  | 2.1  | 1.2      | 0.2  | 0.5 | 1.1  | 1.7  | 0.4 | 0.2   | 0.2  | 0.2  | 0.2  | 0.2 | 0.2  | 0.2  | 0.2  | 0.2  | 0.2  |      |
| ALDOC    | 3.1  | 2.2  | 1    | 0.8  | 2.3 | 0.2  | 1.7  | 2.7  | 2.2  | 0.6  | 0.3  | 0.3  | 1    | 0.7  | 1.2  | 0.6      | 0.2  | 0.5 | 1.1  | 0.7  | 0.2 | 0.2   | 0.2  | 0.2  | 0.2  | 0.2 | 0.2  | 0.2  | 0.2  | 0.2  | 0.2  |      |
| ENO1     | 4.3  | 3.3  | 1.5  | 0.5  | 0.2 | 1.6  | 1.2  | 1.7  | 2.7  | 2.2  | 0.6  | 0.3  | 0.1  | 2.1  | 2.8  | 0.6      | 0.7  | 0.5 | 0.4  | 0.3  | 0.2 | 0.2   | 0.2  | 0.2  | 0.2  | 0.2 | 0.2  | 0.2  | 0.2  | 0.2  |      |      |
| FBP1     | 3.3  | 3    | 0.5  | 0.3  | 0.6 | 2.1  | 0.4  | 0.6  | 1.4  | 0.6  | 0.3  | 0.7  | 0.8  | 1.1  | 0.4  | 0.6      | 0.2  | 0.7 | 1.1  | 0.4  | 0.2 | 0.2   | 0.2  | 0.2  | 0.2  | 0.2 | 0.2  | 0.2  | 0.2  | 0.2  | 0.2  |      |
| G6PC2    | 7.3  | 4.7  | 1.7  | 0.5  | 1.3 | 0.9  | 2.4  | 0.6  | 0.7  | 1    | 0.4  | 0.3  | 0.7  | 0.8  | 1.2  | 0.6      | 0.2  | 0.3 | 0.6  | 0.6  | 0.2 | 0.2   | 0.2  | 0.2  | 0.2  | 0.2 | 0.2  | 0.2  | 0.2  | 0.2  | 0.2  |      |
| GAPDH    | 2.4  | 3    | 1.5  | 1.8  | 0.3 | 1.3  | 0.9  | 0.8  | 1.1  | 1.1  | 1    | 0.4  | 0.3  | 0.6  | 1.2  | 0.6      | 0.2  | 0.3 | 0.4  | 0.6  | 0.2 | 0.2   | 0.2  | 0.2  | 0.2  | 0.2 | 0.2  | 0.2  | 0.2  | 0.2  | 0.2  |      |
| MDH1     | 5.3  | 3.6  | 1.7  | 0.3  | 1.1 | 0.9  | 0.8  | 1.1  | 1.4  | 0.2  | 0.4  | 0.6  | 0.4  | 1.1  | 1.2  | 0.6      | 0.2  | 0.3 | 0.4  | 0.6  | 0.2 | 0.2   | 0.2  | 0.2  | 0.2  | 0.2 | 0.2  | 0.2  | 0.2  | 0.2  | 0.2  |      |
| MDH2     | 4.1  | 5    | 1    | 0.5  | 0.4 | 0.7  | 0.8  | 0.6  | 1.1  | 0.2  | 0.4  | 0.6  | 0.3  | 1.3  | 1.2  | 0.6      | 0.2  | 0.5 | 0.4  | 0.6  | 0.2 | 0.2   | 0.2  | 0.2  | 0.2  | 0.2 | 0.2  | 0.2  | 0.2  | 0.2  | 0.2  |      |
| PK01     | 6.9  | 10   | 3    | 1.8  | 2.1 | 3.2  | 3.3  | 6.9  | 0.6  | 1.1  | 0.8  | 1.3  | 2.3  | 0.8  | 2.9  | 0.6      | 0.2  | 2.4 | 2.6  | 1.4  | 0.6 | 0.9   | 0.8  | 0.6  | 0.6  | 0.6 | 0.6  | 0.6  | 0.6  | 0.6  | 0.6  |      |
| PKG1     | 6.9  | 3    | 1.5  | 1.3  | 1.1 | 1.6  | 2.6  | 2.2  | 2.9  | 1    | 0.4  | 0.3  | 0.7  | 1.7  | 3.5  | 0.6      | 0.2  | 0.5 | 0.9  | 0.4  | 0.2 | 0.2   | 0.2  | 0.2  | 0.2  | 0.2 | 0.2  | 0.2  | 0.2  | 0.2  | 0.2  |      |
| PKG2     | 5.7  | 17.7 | 0.5  | 0.3  | 6.7 | 1.6  | 6.5  | 1.7  | 2.7  | 0.7  | 1.4  | 1.1  | 0.6  | 3.3  | 3.5  | 0.6      | 0.2  | 0.5 | 0.9  | 0.4  | 0.2 | 0.2   | 0.2  | 0.2  | 0.2  | 0.2 | 0.2  | 0.2  | 0.2  | 0.2  | 0.2  |      |
| SLC25A1  | 3.7  | 1.7  | 0.5  | 0.8  | 1.1 | 1.4  | 1.1  | 0.7  | 0.2  | 0.6  | 0.6  | 0.6  | 1.1  | 0.6  | 0.6  | 0.2      | 0.2  | 0.2 | 0.2  | 0.2  | 0.2 | 0.2   | 0.2  | 0.2  | 0.2  | 0.2 | 0.2  | 0.2  | 0.2  | 0.2  | 0.2  |      |
| SLC25A12 | 7.1  | 4.7  | 2.7  | 0.8  | 1.1 | 2.3  | 2    | 1.1  | 2.5  | 0.8  | 0.4  | 1.7  | 0.9  | 3.3  | 2.8  | 0.6      | 0.7  | 0.5 | 1.1  | 0.3  | 0.2 | 1.3   | 0.2  | 0.2  | 0.2  | 0.2 | 0.2  | 0.2  | 0.2  | 0.2  | 0.2  |      |
| SLC25A18 | 1.9  | 5    | 2    | 3.6  | 0.8 | 2.6  | 2.8  | 2.6  | 2.7  | 1.8  | 0.8  | 1.3  | 0.9  | 0.7  | 0.8  | 1.2      | 0.6  | 0.4 | 0.5  | 1.1  | 0.9 | 0.2   | 0.2  | 0.2  | 0.2  | 0.2 | 0.2  | 0.2  | 0.2  | 0.2  | 0.2  |      |
| SLC37A4  | 4.3  | 1.7  | 0.7  | 0.3  | 0.4 | 0.7  | 0.6  | 1.4  | 0.6  | 0.3  | 0.5  | 0.3  | 1.3  | 0.7  | 0.7  | 0.7      | 0.7  | 1.5 | 0.6  | 0.2  | 0.2 | 0.2   | 0.2  | 0.2  | 0.2  | 0.2 | 0.2  | 0.2  | 0.2  | 0.2  | 0.2  |      |

Supplementary Figure 2: Highlight table showing the fractions of tumours with

alterations in glycolytic pathway genes across all human cancers. The increasing colour intensities denote higher percentages of altered genes.

| Gene   | UCEC | SKCM | BLCA | LIHC | OV  | LUSC | STAD | LUAD | ESCA | DLBC | CESC | HNSC | SARC | LIHC | BRCA | COADREAD | CHOL | ACC | PAAD | PRAD | GBM | KIPAN | KIRC | MESO | LGGL | UVM | PCPG | TGCT | KICH | THYM | LAML | THCA |
|--------|------|------|------|------|-----|------|------|------|------|------|------|------|------|------|------|----------|------|-----|------|------|-----|-------|------|------|------|-----|------|------|------|------|------|------|
| ENO2   | 3.5  | 3    | 1.5  | 1.8  | 0.5 | 1.1  | 1.9  | 1.2  | 0.6  | 1.4  | 0.6  | 0.4  | 0.6  | 0.2  | 0.6  | 1.2      | 0.6  | 0.2 | 0.5  | 0.4  | 0.3 | 0.2   | 0.2  | 0.2  | 0.2  | 0.2 | 0.2  | 0.2  | 0.2  | 0.2  | 0.2  |      |
| ENO3   | 6.1  | 2.2  | 1.5  | 1.8  | 0.3 | 0.4  | 1.4  | 1.2  | 0.6  | 1.4  | 1    | 1.6  | 0.6  | 0.6  | 0.3  | 2.5      | 1.2  | 0.6 | 0.2  | 0.5  | 0.4 | 0.3   | 0.2  | 0.2  | 0.2  | 0.2 | 0.2  | 0.2  | 0.2  | 0.2  | 0.2  | 0.2  |
| FBP2   | 4.1  | 6.4  | 0.7  | 0.5  | 0.9 | 2.3  | 1.2  | 1.7  | 5.4  | 0.6  | 0.4  | 0.6  | 0.3  | 2.7  | 1.2  | 0.6      | 0.2  | 1.6 | 0.7  | 1.3  | 0.4 | 0.2   | 0.2  | 0.2  | 0.2  | 0.2 | 0.2  | 0.2  | 0.2  | 0.2  | 0.2  | 0.2  |
| G6PC2  | 4.7  | 5    | 1    | 0.5  | 1.7 | 0.9  | 2.2  | 0.6  | 1.1  | 0.4  | 1.7  | 0.2  | 1.5  | 1.2  | 0.6  | 0.4      | 0.5  | 0.9 | 0.9  | 0.9  | 0.9 | 0.2   | 0.2  | 0.2  | 0.2  | 0.2 | 0.2  | 0.2  | 0.2  | 0.2  | 0.2  | 0.2  |
| GAPDH5 | 8.4  | 3.3  | 1.7  | 0.3  | 2.8 | 3.1  | 2.2  | 2.2  | 2.5  | 0.8  | 0.4  | 0.3  | 0.3  | 2.1  | 1.2  | 1.2      | 0.6  | 0.2 | 0.4  | 0.7  |     |       |      |      |      |     |      |      |      |      |      |      |

Lipid Biosynthesis Pathway Alterations

|          | UCEC | SKCM | BLCA | UCS | OV  | LUSC | STAD | LUAD | ESCA | DLBC | CESC | HNSC | SARC | LHCC | BRCA | COADREAD | CHOL | ACC | PAAD | PRAD | GBM | KIRP | KIRC | MESO | LGG | LIHM | PCPG | TGCT | KICH | THYM | LAML | THCA |     |     |  |
|----------|------|------|------|-----|-----|------|------|------|------|------|------|------|------|------|------|----------|------|-----|------|------|-----|------|------|------|-----|------|------|------|------|------|------|------|-----|-----|--|
| ACACA    | 13.6 | 19.9 | 9.6  | 1.8 | 1.5 | 5.2  | 7.3  | 4.6  | 5    | 2.7  | 4.7  | 4.9  | 1.3  | 3.4  | 2.1  | 8.4      |      | 1.2 | 0.6  | 1.3  | 2.7 | 2.2  | 1.7  | 1.6  |     |      |      |      |      |      | 0.8  |      | 1.3 | 0.5 |  |
| ACLY     | 8.1  | 6.1  | 5.2  | 1.8 | 1.3 | 1.3  | 3.3  | 0.8  | 1.1  |      | 4    | 1.6  | 2.6  | 1.4  | 1    | 3.6      | 2.8  | 1.2 | 1.2  | 0.4  | 0.5 | 1.8  | 1.7  | 0.8  |     |      |      |      |      |      | 0.8  | 1.6  | 0.9 | 0.5 |  |
| ACSF3    | 6.5  | 3.9  | 1.7  | 1.8 | 0.3 | 1.3  | 1.9  | 2.2  | 0.6  |      | 2.2  | 0.6  | 1.8  | 0.9  | 0.3  | 1.7      |      |     |      |      | 0.6 | 0.5  | 1.1  | 0.3  | 0.4 |      |      |      |      |      | 3.3  |      | 2   |     |  |
| ACSL3    | 7.5  | 4.7  | 0.7  |     | 0.5 | 1.5  | 2.3  | 0.4  | 1.1  | 2.7  | 1.1  | 0.6  | 0.4  | 0.9  | 0.4  | 1.9      | 2.8  | 3.5 | 0.6  |      |     | 0.5  |      | 0.3  | 0.2 |      |      |      |      |      |      |      | 2   |     |  |
| CBR4     | 3.1  | 1.9  | 1.2  |     |     | 0.2  |      | 0.6  |      |      | 0.4  | 0.4  |      | 0.6  |      | 2.3      |      |     |      |      |     | 0.4  | 0.6  | 0.2  |     |      |      |      |      |      |      | 1.6  |     | 0.7 |  |
| ELOVL5   | 6.5  | 3.9  | 1.2  |     | 0.3 | 0.4  | 0.5  | 0.6  | 2.2  |      | 1.8  | 0.6  |      | 0.3  | 0.7  | 1.3      |      |     |      | 2.3  |     |      | 0.3  | 0.9  | 0.2 |      |      |      |      |      |      |      | 2   | 0.3 |  |
| MORC2    | 10.2 | 11   | 1.5  |     | 2.3 | 2.1  | 2.8  | 1    | 2.2  |      | 2.5  | 1.6  | 0.4  | 1.4  | 0.7  | 3.4      |      |     |      |      | 1.2 | 0.2  | 0.8  | 1.5  | 0.6 | 0.8  | 1.3  |      |      |      | 1.6  | 1.9  | 1.3 |     |  |
| PPT1     | 4.1  | 1.9  | 0.5  |     | 0.3 | 1.3  | 1.9  | 1    | 0.6  |      | 0.7  | 0.4  |      | 0.6  | 0.2  | 0.4      |      |     |      | 1.2  |     |      | 0.2  |      |     |      |      |      |      |      |      | 0.9  | 1.3 | 0.3 |  |
| SCD      | 7.3  | 3.3  | 0.5  | 1.8 |     | 0.4  | 0.7  | 0.4  | 0.6  |      | 0.7  | 0.4  | 0.4  | 0.6  | 0.1  | 1        |      |     |      |      | 0.6 | 0.7  | 0.5  |      |     | 0.4  |      |      |      |      |      |      | 0.7 |     |  |
| SLC27A3  | 5.9  | 4.4  | 2.5  |     | 0.5 | 1.9  | 1.9  | 2.2  | 0.6  |      | 1.1  |      | 0.4  | 0.9  | 0.3  | 1.9      |      |     |      |      | 0.6 |      | 0.5  | 1.1  | 0.3 |      |      |      |      |      |      | 0.9  | 0.7 |     |  |
| TECRL    | 6.7  | 10.8 | 4.2  |     | 0.3 | 4.9  | 2.6  | 7.9  | 4.4  | 2.7  | 0.7  | 2.4  |      | 1.1  | 0.5  | 4.6      |      |     |      | 2.3  |     | 0.2  | 0.3  | 1.1  | 0.9 | 0.4  |      | 0.9  |      |      |      |      |     |     |  |
| ACSBG1   | 7.5  | 7.2  | 1.2  |     | 1   | 4.1  | 2.6  | 2.4  | 1.1  | 2.7  | 2.2  | 1.8  | 0.9  | 0.3  | 1.3  | 3.6      |      |     |      | 1.2  | 0.6 | 1.1  | 0.8  | 1.1  | 0.9 | 1.2  |      |      |      |      |      | 0.9  | 0.3 |     |  |
| ACSBG2   | 9    | 11.3 | 3.2  |     | 0.8 | 1.1  | 2.1  | 1.4  | 2.2  |      | 1.8  | 1.6  | 0.9  | 0.6  | 0.5  | 3.1      |      |     |      |      | 0.6 | 0.2  | 1.1  | 0.7  | 0.9 | 0.6  |      |      |      |      |      |      |     |     |  |
| ACSL1    | 7.5  | 6.6  | 1.2  | 1.8 | 1.5 | 2.1  | 1.6  | 3.4  |      | 2.7  | 1.4  | 1    | 0.4  | 0.9  | 0.3  | 3.3      |      |     |      | 3.5  | 0.6 | 0.4  | 0.8  | 1.1  | 0.6 | 0.8  |      |      |      |      |      | 0.9  |     |     |  |
| ACSL4    | 12.4 | 4.7  | 1.2  | 3.6 | 0.5 | 0.4  | 1.9  | 1.6  | 0.6  |      | 4.3  | 1.2  | 2.2  | 0.6  | 1.4  | 3.4      |      |     |      |      | 1.2 |      | 1.1  | 0.4  | 0.3 | 1.3  | 1    |      |      |      |      |      |     |     |  |
| ACSL5    | 6.9  | 12.4 | 2    | 1.8 | 0.5 | 1.3  | 2.8  | 1    | 1.1  |      | 0.7  | 1.2  |      | 0.6  | 1.1  | 3.1      | 2.8  |     |      |      | 0.6 | 0.2  | 0.5  | 0.4  | 0.3 | 0.2  |      |      |      |      |      | 1.6  |     |     |  |
| ACSL6    | 7.9  | 9.4  | 1.5  |     | 0.5 | 4.1  | 3.1  | 4.2  | 0.6  |      | 2.2  | 0.2  | 2.6  | 0.9  | 0.5  | 3.4      |      |     |      |      | 0.6 | 0.4  | 0.5  | 0.7  | 1.1 | 0.8  |      |      | 0.8  |      |      |      |     | 0.3 |  |
| ELOVL1   | 2.6  | 2.8  | 0.7  |     | 0.5 | 0.6  | 1.2  | 0.4  | 0.6  |      | 0.7  | 0.2  |      | 0.3  | 0.1  | 1.3      |      |     |      |      |     | 0.2  |      |      |     |      |      |      |      |      |      |      |     | 0.5 |  |
| ELOVL2   | 5.7  | 3.3  | 0.7  |     | 1.3 | 0.2  | 2.1  | 1.4  | 0.6  |      | 0.4  | 0.2  | 0.4  | 0.3  |      | 2.5      |      |     |      |      | 0.6 |      | 1.1  | 0.4  | 0.3 | 0.2  | 1.3  |      |      |      |      |      |     |     |  |
| ELOVL3   | 4.3  | 5.2  | 0.5  |     | 0.5 | 1.3  | 0.9  | 1.2  | 0.6  |      | 1.2  | 0.4  | 0.6  | 0.7  | 1.3  |          |      |     |      |      | 0.6 | 0.2  |      |      | 0.3 | 0.2  |      |      |      |      |      |      |     |     |  |
| ELOVL4   | 8.4  | 7.2  |      |     | 1.3 | 1.3  | 1.4  | 3.2  | 1.1  |      | 1.4  | 0.4  |      | 0.9  | 0.5  | 2.1      |      |     |      | 1.2  | 0.6 | 0.2  | 0.8  | 0.7  | 0.6 | 0.4  |      |      |      |      |      |      |     |     |  |
| ELOVL6   | 8.6  | 2.5  | 0.5  |     | 0.5 | 0.4  | 0.7  | 0.6  | 1.7  | 2.7  | 1.8  | 0.6  | 0.4  |      | 0.5  | 1.7      | 2.8  |     |      |      | 0.6 | 0.9  | 0.5  | 0.7  |     |      |      |      |      |      |      | 1.9  |     |     |  |
| ELOVL7   | 6.3  | 4.7  | 1.7  | 1.8 | 0.3 | 0.6  | 1.2  | 0.6  | 0.6  |      | 0.7  | 0.8  | 0.4  | 0.6  | 0.5  | 1.5      |      |     |      | 2.3  | 0.6 |      | 1.1  |      |     |      |      |      |      |      | 1.6  |      |     |     |  |
| HSD17B12 | 4.3  | 4.4  | 2    | 1.8 | 0.5 | 1.1  | 1.6  | 1.6  | 2.2  |      | 0.7  | 1    | 0.9  | 0.3  | 0.5  | 1.1      |      |     |      |      | 1.2 |      | 0.3  |      | 0.3 |      |      |      |      |      |      |      |     | 0.5 |  |
| HSD17B3  | 5.5  | 4.4  | 0.5  |     | 0.3 | 0.2  | 0.5  | 0.8  | 0.6  |      | 0.7  | 0.4  | 0.6  | 0.6  | 0.6  | 1.7      |      |     |      |      | 0.6 | 0.4  |      |      |     |      |      |      |      |      |      |      |     |     |  |
| OLAH     | 6.9  | 5    | 0.7  | 1.8 |     | 1.5  | 0.7  | 2.2  | 1.1  |      | 1.4  | 1.4  |      | 0.6  | 0.6  | 2.1      |      |     |      | 1.2  |     | 0.2  |      | 1.1  | 0.3 | 0.2  |      |      |      |      |      |      |     |     |  |
| PPT2     | 2.8  | 1.7  | 1.5  |     | 0.3 | 1.1  | 1.2  | 1.8  | 0.6  |      | 0.7  | 0.6  |      | 1.1  | 0.4  | 1.9      |      |     |      |      | 0.6 | 0.4  | 0.3  | 0.4  |     |      |      | 1.7  | 0.8  |      |      |      | 0.3 |     |  |
| SCD5     | 4.3  | 4.4  | 0.5  |     | 0.8 | 0.2  | 2.1  | 2.6  | 0.6  |      | 1.8  | 0.8  | 1.3  | 0.3  | 0.4  | 1.9      |      |     |      |      | 0.6 |      | 0.5  | 1.5  | 0.6 | 0.8  |      |      |      |      | 1.6  |      |     |     |  |
| SLC25A1  | 3.7  | 1.7  | 0.5  |     | 0.5 |      | 1.4  |      |      |      | 0.7  | 0.2  |      | 0.6  | 0.6  | 1.1      |      |     |      |      | 0.6 |      | 0.3  | 0.4  |     |      |      |      |      |      |      |      |     |     |  |
| TECR     | 4.7  | 1.1  | 2.2  | 1.8 | 0.5 | 0.6  | 1.2  | 0.2  | 1.1  | 2.7  | 1.4  | 1.2  |      | 1.1  | 0.1  | 1.7      |      |     |      | 1.2  | 1.2 |      | 1.1  | 0.7  | 0.6 | 0.2  |      |      |      |      | 0.8  |      |     |     |  |

18

19 **Supplementary Figure 4:** Highlight table showing the fractions of tumours with

20 alterations in mitochondrial fatty acid oxidation pathway genes across all human

21 cancers. Increasing colour intensities denote higher percentages of altered genes.

Mitochondrial Fatty Acid Oxidation Pathway Alterations

|        | UCEC | SKCM | BLCA | UCS | OV  | LUSC | STAD | LUAD | ESCA | DLBC | CESC | HNSC | SARC | LHCC | BRCA | COADREAD | CHOL | ACC | PAAD | PRAD | GBM | KIRP | KIRC | MESO | LGG | LIHM | PCPG | TGCT | KICH | THYM | LAML | THCA |     |     |  |
|--------|------|------|------|-----|-----|------|------|------|------|------|------|------|------|------|------|----------|------|-----|------|------|-----|------|------|------|-----|------|------|------|------|------|------|------|-----|-----|--|
| ACAD11 | 7.1  | 6.1  | 1.7  |     | 1.5 | 1.9  | 3.1  | 2    | 1.7  |      | 2.9  | 1.4  | 0.9  | 1.7  | 0.8  | 3.4      |      |     |      | 0.6  |     | 1.1  | 0.4  | 0.3  | 0.4 |      |      |      |      |      |      |      | 0.7 |     |  |
| ACADS  | 4.3  | 1.7  | 2    |     | 0.5 | 0.4  | 1.4  | 0.6  |      |      | 1.1  | 1.2  | 0.4  |      | 0.1  | 2.1      |      |     |      | 1.2  | 0.6 | 0.7  | 1.3  | 0.4  | 0.6 | 0.4  |      |      |      |      |      |      |     | 0.7 |  |
| ACOT11 | 6.7  | 8    | 3.7  |     | 1.7 | 2.1  | 1.6  | 1.6  | 2.2  |      | 0.4  | 1.4  | 1.3  | 0.3  | 0.7  | 2.3      |      |     |      |      | 0.2 | 0.8  | 0.7  |      | 1.3 | 0.6  |      |      |      |      |      |      |     | 0.7 |  |
| ACOT9  | 5.3  | 2.5  | 0.5  |     | 0.5 | 0.6  | 1.4  | 0.8  | 0.6  |      | 1.4  | 0.6  |      | 0.3  | 0.3  | 1.5      |      |     |      | 1.2  |     | 0.5  | 1.1  | 0.3  | 0.6 |      |      |      | 0.8  |      |      |      |     | 0.7 |  |
| ACSF2  | 5.3  | 7.2  | 2    |     | 0.3 | 1.7  | 1.2  | 1    | 1.7  |      | 2.9  | 0.8  | 1.8  | 0.6  | 1    | 1.9      |      |     |      |      | 0.6 |      | 0.5  | 3.3  | 1.1 | 2.6  |      |      |      |      |      |      |     | 0.7 |  |
| DFOR1  | 3.3  | 3.6  | 2.2  |     | 0.6 | 0.6  | 1.9  | 0.6  | 1.1  |      | 0.4  | 0.6  | 0.4  | 0.6  | 0.6  | 1.7      |      |     |      |      | 0.6 |      | 0.8  | 0.7  | 0.3 | 0.2  |      |      |      |      | 1.6  |      |     | 0.7 |  |
| HADH   | 4.1  | 0.8  | 1.2  | 1.8 | 0.3 | 1.5  | 1.2  | 0.6  | 0.6  |      | 2.2  | 0.8  |      | 0.7  | 1.9  |          |      |     |      | 1.2  | 0.6 | 0.2  | 0.5  | 0.7  | 0.3 | 0.2  |      |      |      |      |      | 0.9  | 0.7 | 0.3 |  |
| MECR   | 3.5  | 3.3  | 1.7  | 1.8 | 0.8 | 0.4  | 0.9  | 0.8  |      |      | 1.1  | 0.8  | 0.4  | 0.3  | 1.3  |          |      |     |      | 1.2  | 0.6 | 0.4  | 1.3  | 1.1  | 0.3 | 0.2  |      |      |      |      |      |      | 0.7 | 0.3 |  |
| THEM5  | 4.1  | 3.3  | 1.2  |     | 0.5 | 0.2  | 1.2  | 1    | 0.6  |      | 1.1  | 0.8  |      |      | 0.6  | 1.3      |      |     |      |      | 0.4 | 0.8  | 0.4  | 0.6  | 1.3 | 0.2  |      |      |      |      |      |      | 0.7 |     |  |
| ACAA2  | 3.5  | 2.5  | 0.5  |     | 1   | 0.6  | 2.3  | 1    | 1.1  |      | 1.4  | 0.4  |      | 0.6  | 0.4  | 1        |      |     |      |      | 0.2 | 0.3  |      |      | 1.3 | 0.6  |      |      |      |      |      |      |     |     |  |
| ACAD10 | 7.7  | 9.1  | 3.2  | 1.8 | 1   | 2.8  | 4    | 2.8  | 1.1  | 2.7  | 2.5  | 3    | 1.3  | 0.3  | 0.8  | 1.7      |      |     |      | 2.3  | 1.2 | 0.7  | 2.1  | 1.5  | 1.1 | 0.4  |      |      |      |      |      |      |     | 0.5 |  |
| ACADL  | 7.1  | 3.6  | 0.5  |     | 1.1 | 1.2  | 1.2  | 1.1  | 0.7  |      | 0.7  | 1    | 0.9  | 0.6  | 0.3  | 2.1      |      |     |      |      | 0.6 |      | 0.5  | 1.1  | 0.3 |      |      |      |      |      |      |      |     |     |  |
| ACADM  | 5.5  | 2.5  | 1.5  |     | 1.5 | 2.4  | 1.6  | 2.6  | 1.1  | 2.7  | 1.1  | 0.6  | 0.4  | 0.9  | 0.3  | 2.1      |      |     |      |      | 0.6 |      | 0.5  | 0.7  | 0.3 | 0.2  |      |      | 0.9  | 0.8  |      | 0.9  |     |     |  |
| ACADVL | 6.5  | 3    | 1.5  |     | 0.8 | 0.4  | 1.4  | 0.6  | 1.1  | 2.7  | 1.1  | 1    | 0.4  | 0.3  | 0.3  | 2.1      | 2.8  |     |      |      | 0.6 | 0.4  | 0.5  | 0.7  | 0.3 | 1.3  | 0.2  |      |      |      |      |      |     | 0.3 |  |
| ACBD6  | 2.9  | 1.9  | 1.2  |     | 0.5 | 0.2  | 0.7  | 0.6  |      | 2.7  |      | 0.6  | 1.3  | 0.6  | 0.1  | 2.1      |      |     |      | 2.3  |     |      | 0.3  | 0.4  |     |      |      |      |      |      |      |      |     |     |  |
| ACBD7  | 2.2  | 1.7  | 2.2  |     | 0.4 | 1.2  | 0.2  |      |      |      | 0.2  |      |      | 0.2  | 0.8  |          |      |     |      |      | 0.2 |      |      | 0.3  |     |      |      |      |      |      |      |      |     |     |  |
| ACOT1  | 2    | 1.7  | 0.2  |     | 0.5 |      | 0.7  | 0.6  | 0.6  |      | 0.7  |      |      | 0.3  | 0.4  | 0.8      |      |     |      |      | 0.6 |      |      |      | 0.2 |      |      |      |      |      |      |      | 1.6 |     |  |
| ACOT12 | 6.9  | 7.7  | 2.2  | 1.8 | 0.8 | 1.3  | 2.6  | 2.8  | 0.6  |      | 1.4  | 1    | 0.4  | 0.6  | 0.3  | 3.4      |      |     |      | 1.8  | 0.4 | 0.8  |      |      | 1.3 |      |      |      |      |      | 1.7  | 1.6  |     | 0.3 |  |
| ACOT13 | 4.3  | 1.7  | 1.2  |     | 0.4 | 0.2  | 0.4  |      |      |      | 1.1  | 0.4  | 0.4  | 0.6  | 0.2  | 1.3      |      |     |      |      |     | 0.3  | 1.5  |      |     |      |      |      |      |      |      |      |     |     |  |
| ACOT2  | 3.5  | 1.7  | 1.2  | 1.8 | 0.5 | 0.9  | 1.2  | 0.8  | 0.6  |      | 1.4  | 0.6  |      | 0.9  | 0.2  | 1.3      |      |     |      |      | 0.2 | 0.5  | 0.7  | 1.1  |     |      |      |      |      |      |      |      |     |     |  |
| DBI    | 3.7  | 1.4  | 1.7  | 1.8 | 0.5 | 1.7  | 0    |      |      |      |      |      |      |      |      |          |      |     |      |      |     |      |      |      |     |      |      |      |      |      |      |      |     |     |  |

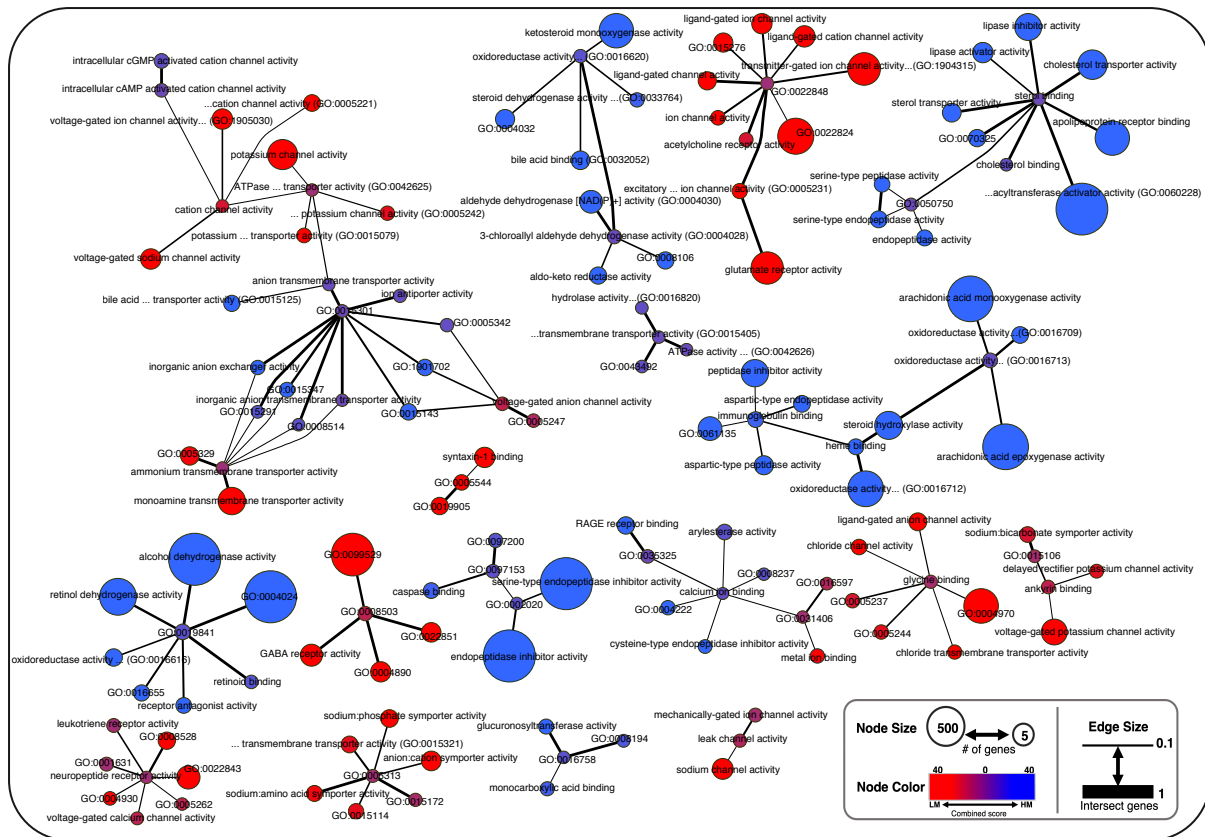

27

28 **Supplementary Figure 6: Network of Gene Ontology (GO) molecular functions**  
 29 found to be enriched between the HM (high metabolic gene alteration frequencies)  
 30 and LM (low metabolic gene alteration frequencies) supertypes <sup>1</sup>. Enrichr was used  
 31 to obtain enriched GO-terms that were visualised in yEd (refer to the methods  
 32 section; <sup>2</sup>). Each node represents a GO-term with similar nodes clustered together  
 33 and connected by edges with the number of shared genes between the nodes being  
 34 represented by the thickness of the edges. The size of each node denotes the gene  
 35 set size of the represented GO-term. The colour of each node represents the  
 36 magnitude of the combined enrichment score: red represents enrichment in LM  
 37 supertype tumours and blue represents enrichment in HM supertypes tumours.

38



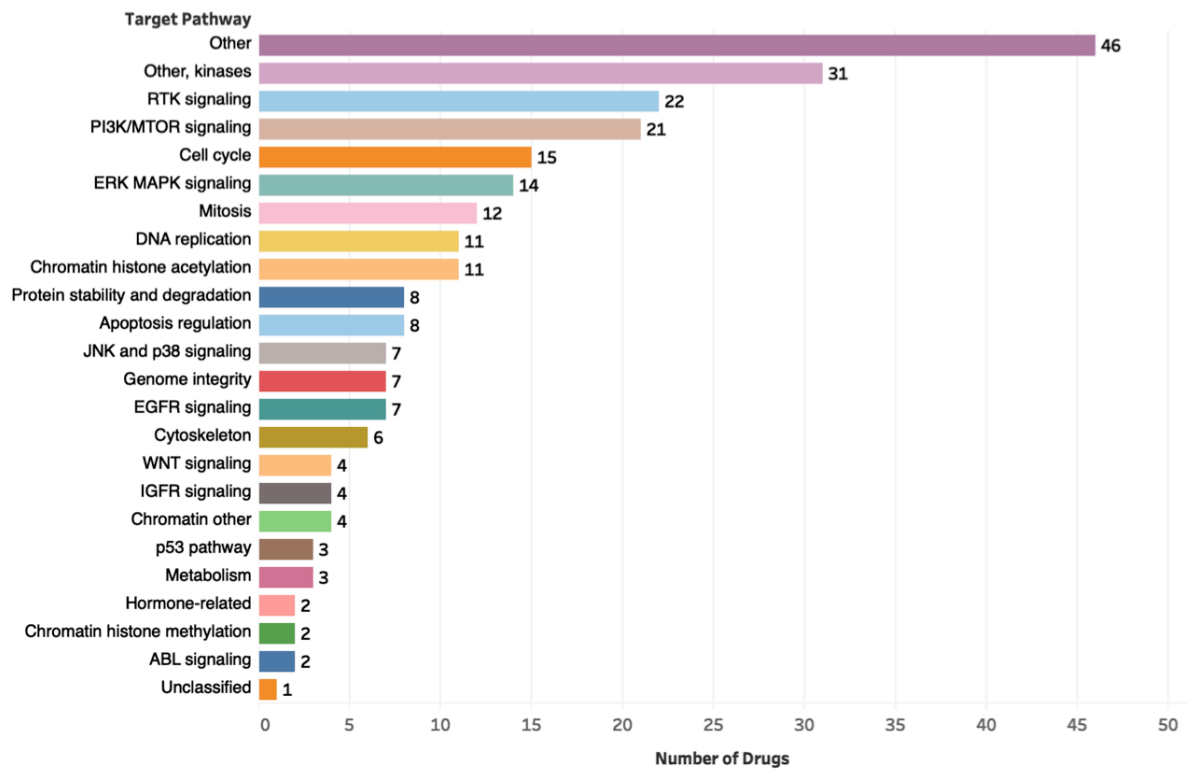

47

48 **Supplementary Figure 8:** The number of anticancer drugs that target 24 signalling  
 49 pathways and/or biological process that were used by the GDSC to treat cancer cell  
 50 lines. Colours indicate the targeted pathways.

51

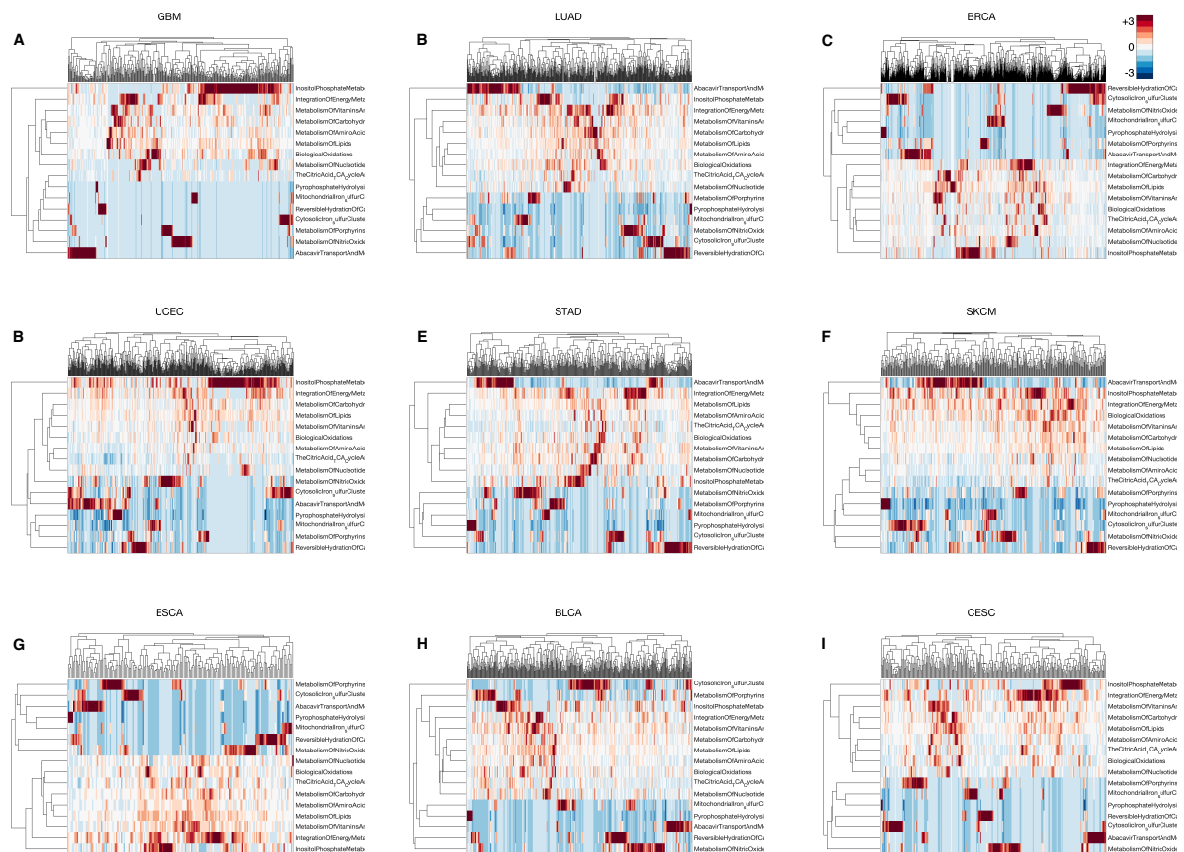

52

53 **Supplementary Figure 9: Metabolic pathway gene alterations within cancer types.**

54 The clustergrams of gene alterations in various human cancer types. Only nine  
 55 examples of cancer types are shown. The clustergrams show the percentage of  
 56 tumours with alterations to genes involved in each of the 16 first-tier metabolic  
 57 pathways.

## 58 **Supplementary References**

59

- 60 1. Gene Ontology Consortium: going forward. *Nucleic Acids Res.* **43**, D1049–  
 61 D1056 (2015).
- 62 2. Chen, E. Y. *et al.* Enrichr: interactive and collaborative HTML5 gene list  
 63 enrichment analysis tool. *BMC Bioinformatics* **14**, 128 (2013).
- 64 3. Yang, W. *et al.* Genomics of Drug Sensitivity in Cancer (GDSC): a resource for  
 65 therapeutic biomarker discovery in cancer cells. *Nucleic Acids Res.* **41**, D955–  
 66 D961 (2012).

67
